# Supplementary material
Source: publisher figshare collection journal article supplement (https://future-science-group.figshare.com/ndownloader/files/33904304)
Supplement: Supplementary file 1 [file 33904304]

## **ONLINE SUPPLEMENTAL MATERIAL**

### **Pharmacogenomic Prescribing Opportunities in Percutaneous Coronary Intervention and Bone Marrow Transplant Patients**

**Supplementary Figure 1.**

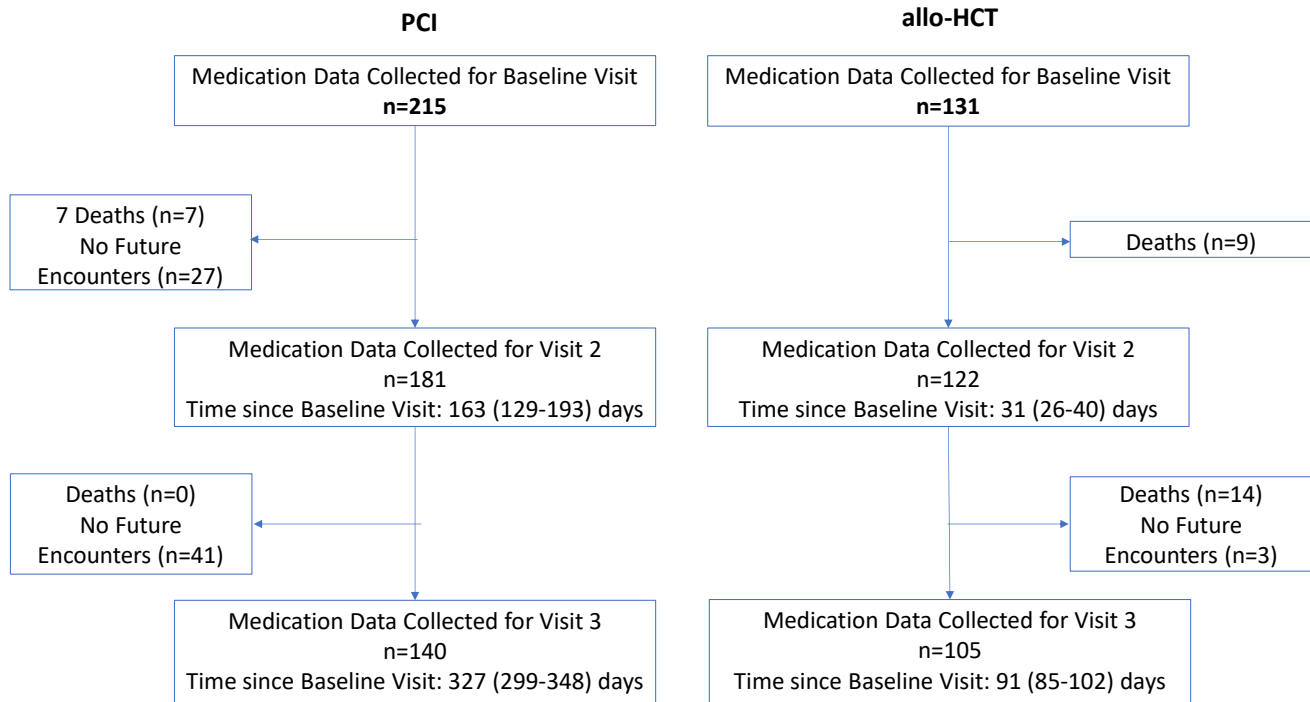

**Supplementary Figure 1. Flow diagram summarizing the number of patients with medication data available at each encounter across the two study populations.** Medication data was collected from three distinct encounters in each population (baseline and two follow-up visits) based on the clinical opportunities for medication prescribing optimization. For the PCI population, the baseline encounter was defined as the index PCI hospitalization discharge summary. Visits 2 and 3 were a follow up cardiologist or primary care provider encounter within a year of the PCI procedure. For the allo-HCT population, the baseline encounter was defined as the pre-transplant visit with the clinical pharmacist. Visit 2 was the discharge summary from the allo-HCT hospitalization, and Visit 3 was a standardized follow-up outpatient clinical visit with the allo-HCT medical team conducted approximately 50 days after discharge from the allo-HCT procedure. The number of patients with medication data at each visit, the number of patients lost during follow-up, and the median (interquartile range) days between the baseline encounter and each follow-up visit are presented for the PCI and allo-HCT populations.

**Supplemental Table 1.** List of 65 medications collected in the PCI and allo-HCT populations with corresponding CPIC level of evidence and FDA evidence classification (sorted alphabetically).

| Drug             | Medication Class                                | Gene(s)                         | CPIC Level of Evidence Classification^ | FDA Evidence Classification                                                                                                 |
|------------------|-------------------------------------------------|---------------------------------|----------------------------------------|-----------------------------------------------------------------------------------------------------------------------------|
| Abacavir         | Reverse transcriptase inhibitor                 | <i>HLA-B</i>                    | A                                      | Data support therapeutic management recommendations                                                                         |
| Allopurinol      | Xanthine oxidase inhibitor                      | <i>HLA-B</i>                    | A                                      | Potential impact on safety or response                                                                                      |
| Amitriptyline    | Tricyclic Antidepressant                        | <i>CYP2C19</i><br><i>CYP2D6</i> | A                                      | <i>CYP2D6</i> : potential impact on pharmacokinetic properties only                                                         |
| Aripiprazole     | Second Generation Antipsychotic                 | <i>CYP2D6</i>                   | B                                      | Data support therapeutic management recommendations                                                                         |
| Atazanavir       | Protease Inhibitor                              | <i>UGT1A1</i>                   | A                                      | <i>No recommendation provided</i>                                                                                           |
| Atomoxetine      | Norepinephrine reuptake inhibitor               | <i>CYP2D6</i>                   | A                                      | Data support therapeutic management recommendations                                                                         |
| Azathioprine     | Immunosuppressant                               | <i>NUDT15</i><br><i>TPMT</i>    | A                                      | Data support therapeutic management recommendations                                                                         |
| Belinostat       | Antineoplastic agent                            | <i>UGT1A1</i>                   | B                                      | Data support therapeutic management recommendations                                                                         |
| Brivaracetam     | Anticonvulsant Agent                            | <i>CYP2C19</i>                  | B                                      | Data support therapeutic management recommendations                                                                         |
| Capecitabine     | Antineoplastic agent                            | <i>DPYD</i>                     | A                                      | Data support therapeutic management recommendations                                                                         |
| Carbamazepine    | Anticonvulsant Agent                            | <i>HLA-A</i><br><i>HLA-B</i>    | A                                      | <i>HLA-B</i> : data support therapeutic management recommendations<br><i>HLA-A</i> : potential impact on safety or response |
| Celecoxib*       | Non-Opioid Analgesic                            | <i>CYP2C9</i>                   | A                                      | Data support therapeutic management recommendations                                                                         |
| Chlorpropamide   | Sulfonylurea                                    | <i>G6PD</i>                     | B                                      | <i>No recommendation provided</i>                                                                                           |
| Citalopram*      | Selective Serotonin Reuptake Inhibitor          | <i>CYP2C19</i>                  | A                                      | Data support therapeutic management recommendations                                                                         |
| Clomipramine     | Tricyclic Antidepressant                        | <i>CYP2C19</i><br><i>CYP2D6</i> | B                                      | <i>CYP2D6</i> : potential impact on pharmacokinetic properties only.                                                        |
| Clopidogrel*     | P2Y12 Inhibitor                                 | <i>CYP2C19</i>                  | A                                      | Data support therapeutic management recommendations                                                                         |
| Codeine*         | Opioid Analgesic                                | <i>CYP2D6</i>                   | A                                      | Data support therapeutic management recommendations, Potential impact on safety or response                                 |
| Desipramine      | Tricyclic Antidepressant                        | <i>CYP2D6</i>                   | B                                      | Potential impact on pharmacokinetic properties only                                                                         |
| Dexlansoprazole* | Proton Pump Inhibitor                           | <i>CYP2C19</i>                  | B                                      | Potential impact on pharmacokinetic properties only                                                                         |
| Doxepin          | Serotonin and Norepinephrine Reuptake Inhibitor | <i>CYP2C19</i><br><i>CYP2D6</i> | B                                      | Potential impact on pharmacokinetic properties only                                                                         |

|                       |                                        |                   |      |                                                             |
|-----------------------|----------------------------------------|-------------------|------|-------------------------------------------------------------|
| Efavirenz             | Reverse transcriptase inhibitor        | CYP2B6            | A    | Potential impact on safety or response                      |
| Escitalopram*         | Selective Serotonin Reuptake Inhibitor | CYP2C19           | A    | Potential impact on pharmacokinetic properties only         |
| Fluorouracil          | Antineoplastic agent                   | DPYD              | A    | Data support therapeutic management recommendations         |
| Flurbiprofen          | NSAID                                  | CYP2C9            | A    | Data support therapeutic management recommendations         |
| Fluvoxamine           | Selective Serotonin Reuptake Inhibitor | CYP2D6            | B    | Potential impact on pharmacokinetic properties only         |
| Glibenclamide         | Sulfonylurea                           | G6PD              | B    | <i>No recommendation provided</i>                           |
| Glimepiride*          | Sulfonylurea                           | G6PD              | B    | <i>No recommendation provided</i>                           |
| Glipizide*            | Sulfonylurea                           | G6PD              | B    | <i>No recommendation provided</i>                           |
| Hydrocodone*          | Opioid Analgesic                       | CYP2D6            | B    | <i>No recommendation provided</i>                           |
| Ibuprofen             | NSAID                                  | CYP2C9            | A    | <i>No recommendation provided</i>                           |
| Imipramine            | Tricyclic Antidepressant               | CYP2C19<br>CYP2D6 | B    | CYP2D6: potential impact on pharmacokinetic properties only |
| Irinotecan            | Antineoplastic agent                   | UGT1A1            | A    | Data support therapeutic management recommendations         |
| Ivacaftor             | Cystic Fibrosis                        | CFTR              | A    | <i>No recommendation provided</i>                           |
| Lansoprazole*         | Proton Pump Inhibitor                  | CYP2C19           | A    | <i>No recommendation provided</i>                           |
| Meloxicam             | NSAID                                  | CYP2C9            | A    | <i>No recommendation provided</i>                           |
| Mercaptopurine        | Antineoplastic agent                   | NUDT15<br>TPMT    | A    | Data support therapeutic management recommendations         |
| Methadone             | Opioid Analgesic                       | CYP2B6            | B    | <i>No recommendation provided</i>                           |
| Nortriptyline         | Tricyclic Antidepressant               | CYP2D6            | A    | Potential impact on pharmacokinetic properties only         |
| Omeprazole*           | Proton Pump Inhibitor                  | CYP2C19           | A    | Potential impact on pharmacokinetic properties only         |
| Ondansetron*          | Antiemetic                             | CYP2D6            | A    | <i>No recommendation provided</i>                           |
| Oxcarbazepine         | Anticonvulsant Agent                   | HLA-B             | A    | Potential impact on safety or response                      |
| Pantoprazole*         | Proton Pump Inhibitor                  | CYP2C19           | A    | Data support therapeutic management recommendations         |
| Paroxetine            | Selective Serotonin Reuptake Inhibitor | CYP2D6            | A    | Potential impact on pharmacokinetic properties only         |
| Peginterferon alfa-2a | Interferon                             | IFNL3<br>IFNL4    | A    | <i>No recommendation provided</i>                           |
| Peginterferon alfa-2b | Interferon                             | IFNL3<br>IFNL4    | A    | <i>No recommendation provided</i>                           |
| Pegloticase           | Urate Oxidase Enzyme                   | G6PD              | B    | <i>No recommendation provided</i>                           |
| Phenytoin             | Anticonvulsant Agent                   | CYP2C9<br>HLA-B   | A, A | <i>No recommendation provided</i>                           |
| Pimozide              | First Generation Antipsychotic         | CYP2D6            | A/B  | Data support therapeutic management recommendations         |
| Piroxicam             | NSAID                                  | CYP2C9            | A    | Data support therapeutic management recommendations         |

|               |                                                 |                            |     |                                                                          |
|---------------|-------------------------------------------------|----------------------------|-----|--------------------------------------------------------------------------|
| Probenecid    | Uricosuric Agent                                | G6PD                       | B   | No recommendation provided                                               |
| Quinine       | Antimalarial Agent                              | G6PD                       | B   | No recommendation provided                                               |
| Rasburicase   | Urate Oxidase Enzyme                            | G6PD                       | A   | No recommendation provided                                               |
| Risperidone   | Second Generation Antipsychotic                 | CYP2D6                     | B   | Potential impact on pharmacokinetic properties only                      |
| Sertraline*   | Selective Serotonin Reuptake Inhibitor          | CYP2C19                    | B   | No recommendation provided                                               |
| Simvastatin*  | HMG-CoA Reductase Inhibitor                     | SLCO1B1                    | A   | Potential impact on safety or response                                   |
| Tacrolimus*   | Immuno-suppressant                              | CYP3A5                     | A   | Data support therapeutic management recommendations                      |
| Tamoxifen     | Antineoplastic agent                            | CYP2D6                     | A   | Potential impact on pharmacokinetic properties only                      |
| Thioguanine   | Antineoplastic agent                            | NUDT15<br>TPMT             | A   | Data support therapeutic management recommendations                      |
| Tramadol*     | Opioid Analgesic                                | CYP2D6                     | A   | Data support therapeutic management recommendations                      |
| Trimipramine  | Tricyclic Antidepressant                        | CYP2C19<br>CYP2D6          | B   | CYP2D6: Potential impact on pharmacokinetic properties only              |
| Tropisetron   | Antiemetic                                      | CYP2D6                     | A   | No recommendation provided                                               |
| Venlafaxine*  | Serotonin and Norepinephrine Reuptake Inhibitor | CYP2D6                     | A/B | Data support therapeutic management recommendations                      |
| Voriconazole* | Antifungal                                      | CYP2C19                    | A   | Potential impact on pharmacokinetic properties only                      |
| Vortioxetine  | Selective Serotonin Reuptake Inhibitor          | CYP2D6                     | A/B | Data support therapeutic management recommendations                      |
| Warfarin*     | Anticoagulant                                   | CYP2C9<br>CYP4F2<br>VKORC1 | A   | CYP2C9, 4F2, VKORC1: data support therapeutic management recommendations |

\* Medication used 1.5% in at least one of the populations and included in simulation analysis

^ Level A drugs have a large amount of evidence in favor of changing prescribing. Level A/B drugs have undergone a preliminary review which indicated the definitive CPIC level will be either A or B, but a full evidence review is needed before final designation is made. Level B drugs have evidence supporting use of genetic information to change prescribing as the alternative therapies or dosing are likely to be as effective and safe as non-genetically based dosing.

The following 50 medications with CPIC Level A, A/B, or B evidence were excluded from data collection (as summarized in Figure 1): Desflurane, enflurane, halothane, isoflurane, methoxyflurane, sevoflurane, succinylcholine, amikacin, gentamicin, kanamycin, streptomycin, tobramycin, ciprofloxacin, chloramphenicol, dapsone, dimercaprol, mafenide, mesalamine, methylene blue, moxifloxacin, nalidixic acid, nitrofurantoin, norfloxacin, phenazopyridine, primaquine, sodium nitrite, sulfacetamide, sulfadiazine, sulfamethoxazole/trimethoprim, sulfasalazine, sulfisoxazole, tafenoquine, fosphenytoin, divalproex sodium, valproic acid, mycophenolic acid, carglumic acid, velaglucerase alfa, eliglustat, siponimod, acenocoumarol, phenprocoumon, tetrabenazine, oliceridine, pitolisant, tenoxicam, lornoxicam, hydralazine, rosuvastatin, aspirin

**Supplementary Table 2.** Summary of *CYP2C19* Simulation Analysis

| Medication Class                                                                                     | Medication      | CPIC Level of Evidence | # of Patients Prescribed PCI |        | # of Patients Prescribed allo-HCT |        | At Risk Genotype/Phenotype Group | At Risk Phenotype Frequency (AA) | At Risk Phenotype Frequency (European) | Projected No. of PGx Interventions PCI | Projected No. of PGx Interventions allo-HCT | CPIC Guideline Citation                    | CPIC Recommendation*                                                                                                                                                   | CPIC Strength of Recommendation                                               |                                                                               |
|------------------------------------------------------------------------------------------------------|-----------------|------------------------|------------------------------|--------|-----------------------------------|--------|----------------------------------|----------------------------------|----------------------------------------|----------------------------------------|---------------------------------------------|--------------------------------------------|------------------------------------------------------------------------------------------------------------------------------------------------------------------------|-------------------------------------------------------------------------------|-------------------------------------------------------------------------------|
|                                                                                                      |                 |                        | AA                           | Non-AA | AA                                | Non-AA |                                  |                                  |                                        |                                        |                                             |                                            |                                                                                                                                                                        |                                                                               |                                                                               |
| P2Y12i                                                                                               | Clopidogrel     | A                      | N/A                          | N/A    | 0                                 | 0      | Intermediate Metabolizers        | 27.70%                           | 24.90%                                 | N/A                                    | 0                                           | PMID: 23698643                             | Use alternative agent                                                                                                                                                  | Moderate                                                                      |                                                                               |
|                                                                                                      |                 |                        |                              |        |                                   |        | Poor Metabolizers                | 3.39%                            | 2.20%                                  | N/A                                    | 0                                           |                                            |                                                                                                                                                                        |                                                                               |                                                                               |
| PPI                                                                                                  | Dexlansoprazole | B                      | 15                           | 72     | 18                                | 80     | Ultrarapid Metabolizers          | 4.29%                            | 4.68%                                  | 4                                      | 5                                           | PMID: 32770672                             | Initiate standard starting daily dose. For chronic therapy (> 12 weeks) and efficacy achieved, consider 50% reduction in daily dose and monitor for continued efficacy | Omeprazole, Lansoprazole, Pantoprazole: Optional<br>Dexlansoprazole: Optional |                                                                               |
|                                                                                                      | Lansoprazole    | A                      |                              |        |                                   |        | Intermediate Metabolizers        | 27.70%                           | 24.90%                                 | 22                                     | 25                                          |                                            |                                                                                                                                                                        | Optional                                                                      |                                                                               |
|                                                                                                      | Omeprazole      |                        |                              |        |                                   |        | Poor Metabolizers                | 3.39%                            | 2.20%                                  | 2                                      | 2                                           |                                            |                                                                                                                                                                        |                                                                               | Omeprazole, Lansoprazole, Pantoprazole: Moderate<br>Dexlansoprazole: Optional |
|                                                                                                      | Pantoprazole    |                        |                              |        |                                   |        |                                  |                                  |                                        |                                        |                                             |                                            |                                                                                                                                                                        |                                                                               |                                                                               |
| SSRI                                                                                                 | Citalopram      | A                      | 8                            | 24     | 2                                 | 16     | Ultrarapid/Rapid Metabolizers    | 26.99%                           | 31.68%                                 | 10                                     | 6                                           | PMD: 25974703                              | Use a drug not metabolized by CYP219                                                                                                                                   | Citalopram, Escitalopram: Moderate<br>Sertraline: Optional                    |                                                                               |
|                                                                                                      | Escitalopram    | B                      |                              |        |                                   |        | Poor Metabolizers                | 3.39%                            | 2.20%                                  | 1                                      | 0                                           |                                            | Reduce dose by 50%                                                                                                                                                     | Citalopram, Escitalopram: Moderate<br>Sertraline: Optional                    |                                                                               |
| Antifungal                                                                                           | Voriconazole    |                        | A                            | 0      | 0                                 | 8      | 18                               | Ultrarapid Metabolizers          | 4.29%                                  | 4.68%                                  | 0                                           | 1                                          | PMID: 27981572                                                                                                                                                         | Use alternative agent                                                         | Moderate                                                                      |
|                                                                                                      |                 | Rapid Metabolizers     |                              |        |                                   |        |                                  | 22.70%                           | 27.00%                                 | 0                                      | 7                                           |                                            |                                                                                                                                                                        |                                                                               |                                                                               |
|                                                                                                      |                 | Poor Metabolizers      |                              |        |                                   |        |                                  | 3.39%                            | 2.20%                                  | 0                                      | 1                                           |                                            |                                                                                                                                                                        |                                                                               |                                                                               |
| CYP2C19 Phenotype Frequency Source: PMID: 32770672 (PPI CPIC Guideline)                              |                 |                        |                              |        |                                   |        |                                  |                                  |                                        | 39                                     | 47                                          | Total Number of Interventions              |                                                                                                                                                                        |                                                                               |                                                                               |
| *In the absence of a specific recommendation by CPIC, the FDA and/or DPWG recommendation is provided |                 |                        |                              |        |                                   |        |                                  |                                  |                                        | 18.1                                   | 35.9                                        | Total Number of Interventions/100 patients |                                                                                                                                                                        |                                                                               |                                                                               |

CYP2C19 Phenotype Frequency Source: PMID: 32770672 (PPI CPIC Guideline)

\*In the absence of a specific recommendation by CPIC, the FDA and/or DPWG recommendation is provided

**Supplementary Table 3.** Summary of *CYP2D6* Simulation Analysis

| Medication Class                                                                                     | Medication  | CPIC Level of Evidence | # of Patients Prescribed PCI |        | # of Patients Prescribed allo-HCT |        | At Risk Genotype/Phenotype Group | At Risk Phenotype Frequency (AA) | At Risk Phenotype Frequency (European) | Projected No. of PGx Interventions PCI | Projected No. of PGx Interventions allo-HCT | CPIC Guideline Citation                    | CPIC Recommendation*                                            | CPIC Strength of Recommendation |
|------------------------------------------------------------------------------------------------------|-------------|------------------------|------------------------------|--------|-----------------------------------|--------|----------------------------------|----------------------------------|----------------------------------------|----------------------------------------|---------------------------------------------|--------------------------------------------|-----------------------------------------------------------------|---------------------------------|
|                                                                                                      |             |                        | AA                           | Non-AA | AA                                | Non-AA |                                  |                                  |                                        |                                        |                                             |                                            |                                                                 |                                 |
| 5-HT3RA                                                                                              | Ondansetron | A                      | 1                            | 14     | 9                                 | 73     | Ultrarapid Metabolizers          | 4.67%                            | 3.13%                                  | 0                                      | 3                                           | PMID: 28002639                             | Use alternative agent not metabolized by CYP2D6                 | Moderate                        |
| Opioid                                                                                               | Hydrocodone | B                      | 4                            | 12     | 1                                 | 2      | Intermediate Metabolizers        | 36.20%                           | 38.95%                                 | 6                                      | 1                                           | PMID: 33387367                             | Consider non-codeine or non-tramadol opioid                     | Optional                        |
|                                                                                                      |             |                        |                              |        |                                   |        | Poor Metabolizers                | 2.33%                            | 6.47%                                  | 1                                      | 0                                           |                                            | Consider non-codeine or non-tramadol opioid                     | Optional                        |
| Opioid                                                                                               | Codeine     | A                      | 1                            | 20     | 1                                 | 19     | Ultrarapid Metabolizers          | 4.67%                            | 3.13%                                  | 1                                      | 1                                           |                                            | Avoid Use                                                       | Strong                          |
|                                                                                                      | Tramadol    |                        |                              |        |                                   |        | Poor Metabolizers                | 2.33%                            | 6.47%                                  | 1                                      | 1                                           |                                            | Avoid Use                                                       | Strong                          |
| SSRI                                                                                                 | Paroxetine  | A                      | 0                            | 3      | 0                                 | 2      | Ultrarapid Metabolizers          | 4.67%                            | 3.13%                                  | 0                                      | 0                                           | PMID: 25974703                             | Select alternative drug not predominantly metabolized by CYP2D6 | Strong                          |
|                                                                                                      |             |                        |                              |        |                                   |        | Poor Metabolizers                | 2.33%                            | 6.47%                                  | 0                                      | 0                                           |                                            | Select alternative drug not predominantly metabolized by CYP2D7 | Optional                        |
| SNRI                                                                                                 | Venlafaxine | A/B                    | 0                            | 6      | 0                                 | 1      | Ultrarapid Metabolizers          | 4.67%                            | 3.13%                                  | 0                                      | 0                                           | N/A                                        | DPWG: increase dose by 150%                                     | N/A                             |
|                                                                                                      |             |                        |                              |        |                                   |        | Intermediate/Poor Metabolizers   | 38.53%                           | 45.42%                                 | 3                                      | 0                                           |                                            | DPWG: Use alternative agent or monitor metabolite levels        | N/A                             |
| CYP2D6 Phenotype Frequency Source: PMID: 33387367 (Opioid CPIC Guideline)                            |             |                        |                              |        |                                   |        |                                  |                                  |                                        | 12                                     | 6                                           | Total Number of Interventions              |                                                                 |                                 |
| *In the absence of a specific recommendation by CPIC, the FDA and/or DPWG recommendation is provided |             |                        |                              |        |                                   |        |                                  |                                  |                                        | 5.6                                    | 4.6                                         | Total Number of Interventions/100 patients |                                                                 |                                 |

## Supplementary Table 4. Summary of Simulation Analysis for additional genes

### VKORC1/CYP2C9

| Medication Class                                                                                                                                                              | Medication | CPIC Level of Evidence | # of Patients Prescribed PCI |        | # of Patients Prescribed allo-HCT |        | At Risk Genotype/Phenotype Group                                                                                              | At Risk Phenotype Frequency (AA) | At Risk Phenotype Frequency (European) | Projected No. of PGx Interventions PCI | Projected No. of PGx Interventions allo-HCT | CPIC Guideline Citation                    | CPIC Recommendation*   | CPIC Strength of Recommendation |
|-------------------------------------------------------------------------------------------------------------------------------------------------------------------------------|------------|------------------------|------------------------------|--------|-----------------------------------|--------|-------------------------------------------------------------------------------------------------------------------------------|----------------------------------|----------------------------------------|----------------------------------------|---------------------------------------------|--------------------------------------------|------------------------|---------------------------------|
|                                                                                                                                                                               |            |                        | AA                           | Non-AA | AA                                | Non-AA |                                                                                                                               |                                  |                                        |                                        |                                             |                                            |                        |                                 |
| Anticoagulant                                                                                                                                                                 | Warfarin   | A                      | 1                            | 6      | 0                                 | 2      | Highly Sensitive Responders                                                                                                   | 0.7%                             | 2.9%                                   | 0                                      | 0                                           | PMID: 28198005                             | Lower dose requirement | Strong                          |
|                                                                                                                                                                               |            |                        |                              |        |                                   |        | Sensitive Responders                                                                                                          | 8.9%                             | 35.4%                                  | 2                                      | 1                                           |                                            | Lower dose requirement | Strong                          |
|                                                                                                                                                                               |            |                        |                              |        |                                   |        | Warfarin Phenotype Frequency source - PMID: 28198005 (Warfarin CPIC guideline) and 25769357 (ENGAGE-TIMI 56 genetic substudy) |                                  |                                        |                                        |                                             |                                            |                        |                                 |
| ^ Based on the VKORC1 and CYP2C9 minor allele frequencies, we assumed the warfarin sensitivity phenotypes in African-Americans were one-fourth of the frequency in Caucasians |            |                        |                              |        |                                   |        |                                                                                                                               |                                  |                                        | 0.9                                    | 0.8                                         | Total Number of Interventions/100 patients |                        |                                 |

### CYP3A5

| Medication Class                                                                                     | Medication | CPIC Level of Evidence | # of Patients Prescribed PCI |        | # of Patients Prescribed allo-HCT |        | At Risk Genotype/Phenotype Group                                              | At Risk Phenotype Frequency (AA) | At Risk Phenotype Frequency (European) | Projected No. of PGx Interventions PCI | Projected No. of PGx Interventions allo-HCT | CPIC Guideline Citation                    | CPIC Recommendation*                                | CPIC Strength of Recommendation |
|------------------------------------------------------------------------------------------------------|------------|------------------------|------------------------------|--------|-----------------------------------|--------|-------------------------------------------------------------------------------|----------------------------------|----------------------------------------|----------------------------------------|---------------------------------------------|--------------------------------------------|-----------------------------------------------------|---------------------------------|
|                                                                                                      |            |                        | AA                           | Non-AA | AA                                | Non-AA |                                                                               |                                  |                                        |                                        |                                             |                                            |                                                     |                                 |
| Immuno-suppressant                                                                                   | Tacrolimus | A                      | 1                            | 4      | N/A                               | N/A    | Extensive Metabolizer                                                         | 20.5%                            | 0.6%                                   | 1                                      | N/A                                         | PMID: 25801146                             | Increase dose 1.5-2 times recommended starting dose | Strong                          |
|                                                                                                      |            |                        |                              |        |                                   |        | Intermediate Metabolizer                                                      | 49.6%                            | 13.7%                                  | 1                                      | N/A                                         |                                            | Increase dose 1.5-2 times recommended starting dose | Strong                          |
|                                                                                                      |            |                        |                              |        |                                   |        | CYP3A5 Phenotype Frequency Source: PMID: 25801146 (Tacrolimus CPIC Guideline) |                                  |                                        |                                        |                                             |                                            |                                                     |                                 |
| *In the absence of a specific recommendation by CPIC, the FDA and/or DPWG recommendation is provided |            |                        |                              |        |                                   |        |                                                                               |                                  |                                        | 0.9                                    | N/A                                         | Total Number of Interventions/100 patients |                                                     |                                 |

### G6PD

| Medication Class                                                                                     | Medication               | CPIC Level of Evidence | # of Patients Prescribed PCI |        | # of Patients Prescribed allo-HCT |        | At Risk Genotype/Phenotype Group | At Risk Phenotype Frequency (AA) | At Risk Phenotype Frequency (European) | Projected No. of PGx Interventions PCI | Projected No. of PGx Interventions allo-HCT | CPIC Guideline Citation                    | CPIC Recommendation* | CPIC Strength of Recommendation |
|------------------------------------------------------------------------------------------------------|--------------------------|------------------------|------------------------------|--------|-----------------------------------|--------|----------------------------------|----------------------------------|----------------------------------------|----------------------------------------|---------------------------------------------|--------------------------------------------|----------------------|---------------------------------|
|                                                                                                      |                          |                        | AA                           | Non-AA | AA                                | Non-AA |                                  |                                  |                                        |                                        |                                             |                                            |                      |                                 |
| Sulfonylurea                                                                                         | Glimepiride<br>Glipizide | B                      | 5                            | 22     | 1                                 | 5      | G6PD Deficient                   | 7.5%                             | 3.9%                                   | 1                                      | 0                                           | N/A                                        | FDA: Avoid use       | N/A                             |
| G6PD Phenotype Frequency Source: PMID: 24787449 (Rasburicase and G6PD CPIC Guideline)                |                          |                        |                              |        |                                   |        |                                  |                                  |                                        | 1                                      | 0                                           | Total Number of Interventions              |                      |                                 |
| *In the absence of a specific recommendation by CPIC, the FDA and/or DPWG recommendation is provided |                          |                        |                              |        |                                   |        |                                  |                                  |                                        | 0.5                                    | 0                                           | Total Number of Interventions/100 patients |                      |                                 |



## Supplementary Table 4 (con't). Summary of Simulation Analysis for additional genes

### SLCO1B1

| Medication Class                                                                                     | Medication  | CPIC Level of Evidence | # of Patients Prescribed PCI |        | # of Patients Prescribed allo-HCT |        | At Risk Genotype/Phenotype Group                                                | At Risk Phenotype Frequency (AA) | At Risk Phenotype Frequency (European) | Projected No. of PGx Interventions PCI | Projected No. of PGx Interventions allo-HCT | CPIC Guideline Citation                    | CPIC Recommendation*                                     | CPIC Strength of Recommendation |
|------------------------------------------------------------------------------------------------------|-------------|------------------------|------------------------------|--------|-----------------------------------|--------|---------------------------------------------------------------------------------|----------------------------------|----------------------------------------|----------------------------------------|---------------------------------------------|--------------------------------------------|----------------------------------------------------------|---------------------------------|
|                                                                                                      |             |                        | AA                           | Non-AA | AA                                | Non-AA |                                                                                 |                                  |                                        |                                        |                                             |                                            |                                                          |                                 |
| HMG-CoA Reductase Inhibitor                                                                          | Simvastatin | A                      | 0                            | 4      | 1                                 | 1      | Decreased Function                                                              | 3.9%                             | 31.5%                                  | 1                                      | 0                                           | PMID: 24918167                             | Prescribe a lower dose, consider routine CK surveillance | Strong                          |
|                                                                                                      |             |                        |                              |        |                                   |        | Poor Function                                                                   | 0.04%                            | 3.83%                                  | 0                                      | 0                                           |                                            | Prescribe a lower dose, consider routine CK surveillance | Strong                          |
|                                                                                                      |             |                        |                              |        |                                   |        | SLCO1B1 Phenotype Frequency Source: PMID: 24918167 (Simvastatin CPIC Guideline) |                                  |                                        |                                        |                                             |                                            |                                                          |                                 |
| *In the absence of a specific recommendation by CPIC, the FDA and/or DPWG recommendation is provided |             |                        |                              |        |                                   |        |                                                                                 |                                  |                                        | 0.5                                    | 0                                           | Total Number of Interventions/100 patients |                                                          |                                 |

### CYP2C9

| Medication Class                                                                                     | Medication | CPIC Level of Evidence | # of Patients Prescribed PCI |        | # of Patients Prescribed allo-HCT |        | At Risk Genotype/Phenotype Group | At Risk Phenotype Frequency (AA) | At Risk Phenotype Frequency (European) | Projected No. of PGx Interventions PCI | Projected No. of PGx Interventions allo-HCT | CPIC Guideline Citation                    | CPIC Recommendation*                                           | CPIC Strength of Recommendation |
|------------------------------------------------------------------------------------------------------|------------|------------------------|------------------------------|--------|-----------------------------------|--------|----------------------------------|----------------------------------|----------------------------------------|----------------------------------------|---------------------------------------------|--------------------------------------------|----------------------------------------------------------------|---------------------------------|
|                                                                                                      |            |                        | AA                           | Non-AA | AA                                | Non-AA |                                  |                                  |                                        |                                        |                                             |                                            |                                                                |                                 |
| NSAID                                                                                                | Celecoxib  | A                      | 0                            | 6      | 2                                 | 1      | Poor Metabolizer                 | 0.52%                            | 2.56%                                  | 0                                      | 0                                           | PMID: 32189324                             | Initiate therapy at 25-50% of lowest recommended starting dose | Moderate                        |
|                                                                                                      | Ibuprofen  |                        |                              |        |                                   |        |                                  |                                  |                                        |                                        |                                             |                                            |                                                                |                                 |
| CYP2C9 Phenotype Frequency Source: PMID: 32189324 (NSAID CPIC Guideline)                             |            |                        |                              |        |                                   |        |                                  |                                  |                                        | 0                                      | 0                                           | Total Number of Interventions              |                                                                |                                 |
| *In the absence of a specific recommendation by CPIC, the FDA and/or DPWG recommendation is provided |            |                        |                              |        |                                   |        |                                  |                                  |                                        | 0                                      | 0                                           | Total Number of Interventions/100 patients |                                                                |                                 |

### HLA-B

| Medication Class                                                                                     | Medication  | CPIC Level of Evidence | # of Patients Prescribed PCI |        | # of Patients Prescribed allo-HCT |        | At Risk Genotype/Phenotype Group | At Risk Phenotype Frequency (AA) | At Risk Phenotype Frequency (European) | Projected No. of PGx Interventions PCI | Projected No. of PGx Interventions allo-HCT | CPIC Guideline Citation                    | CPIC Recommendation*   | CPIC Strength of Recommendation |
|------------------------------------------------------------------------------------------------------|-------------|------------------------|------------------------------|--------|-----------------------------------|--------|----------------------------------|----------------------------------|----------------------------------------|----------------------------------------|---------------------------------------------|--------------------------------------------|------------------------|---------------------------------|
|                                                                                                      |             |                        | AA                           | Non-AA | AA                                | Non-AA |                                  |                                  |                                        |                                        |                                             |                                            |                        |                                 |
| Antigout Agent                                                                                       | Allopurinol | A                      | 1                            | 8      | 1                                 | 2      | HLA-B*58:01 allele positive      | 7.60%                            | 1.60%                                  | 0                                      | 0                                           | PMID: 26094938                             | Use is contraindicated | Strong                          |
| HLA-B Phenotype Frequency Source: PMID: 26094938 (Allopurinol CPIC Guideline)                        |             |                        |                              |        |                                   |        |                                  |                                  |                                        | 0                                      | 0                                           | Total Number of Interventions              |                        |                                 |
| *In the absence of a specific recommendation by CPIC, the FDA and/or DPWG recommendation is provided |             |                        |                              |        |                                   |        |                                  |                                  |                                        | 0                                      | 0                                           | Total Number of Interventions/100 patients |                        |                                 |
